# Supplementary material
Source: publisher figshare collection journal article supplement (https://frontiersin.figshare.com/ndownloader/files/26433128)
Supplement: Supplementary file 1 [file 26433128]

**Supplementary Figure 1.** Photos of the three studied habitat types. Photos by Balázs Deák.


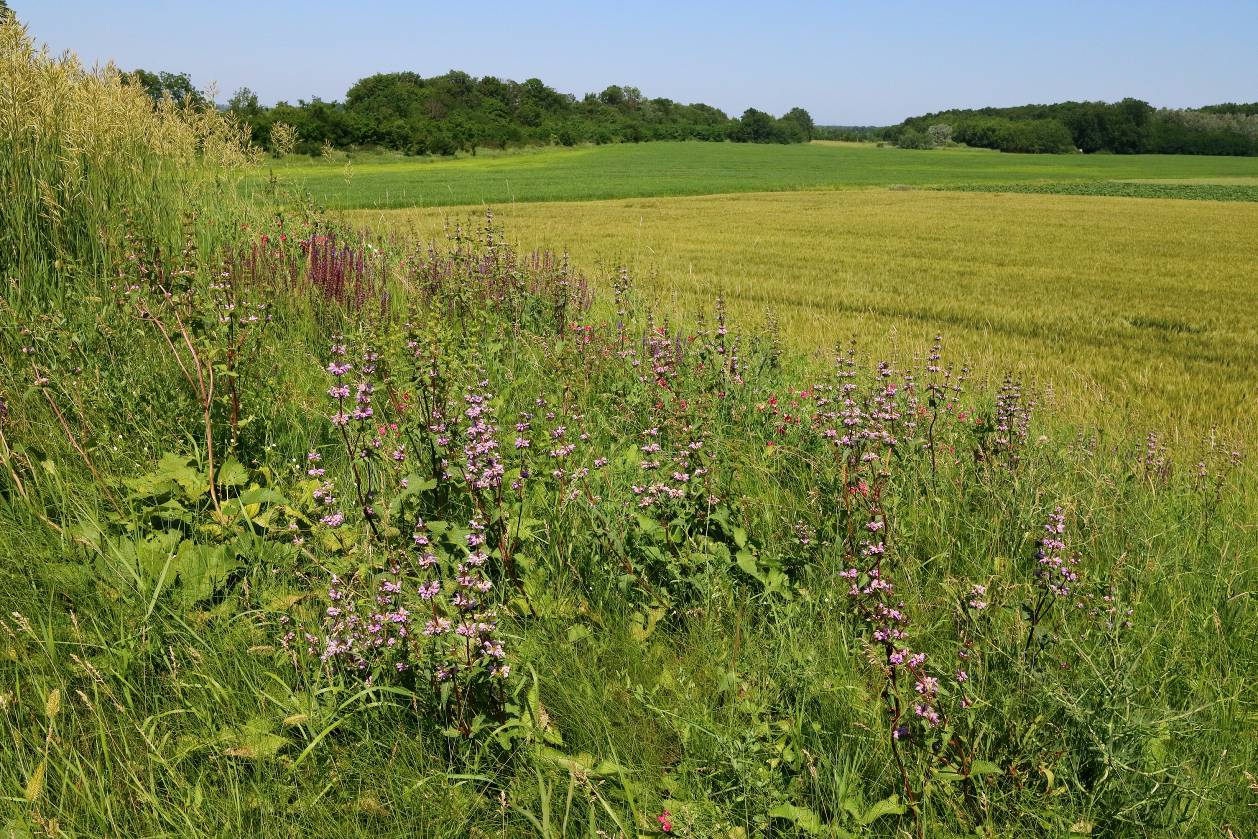


Kurgan


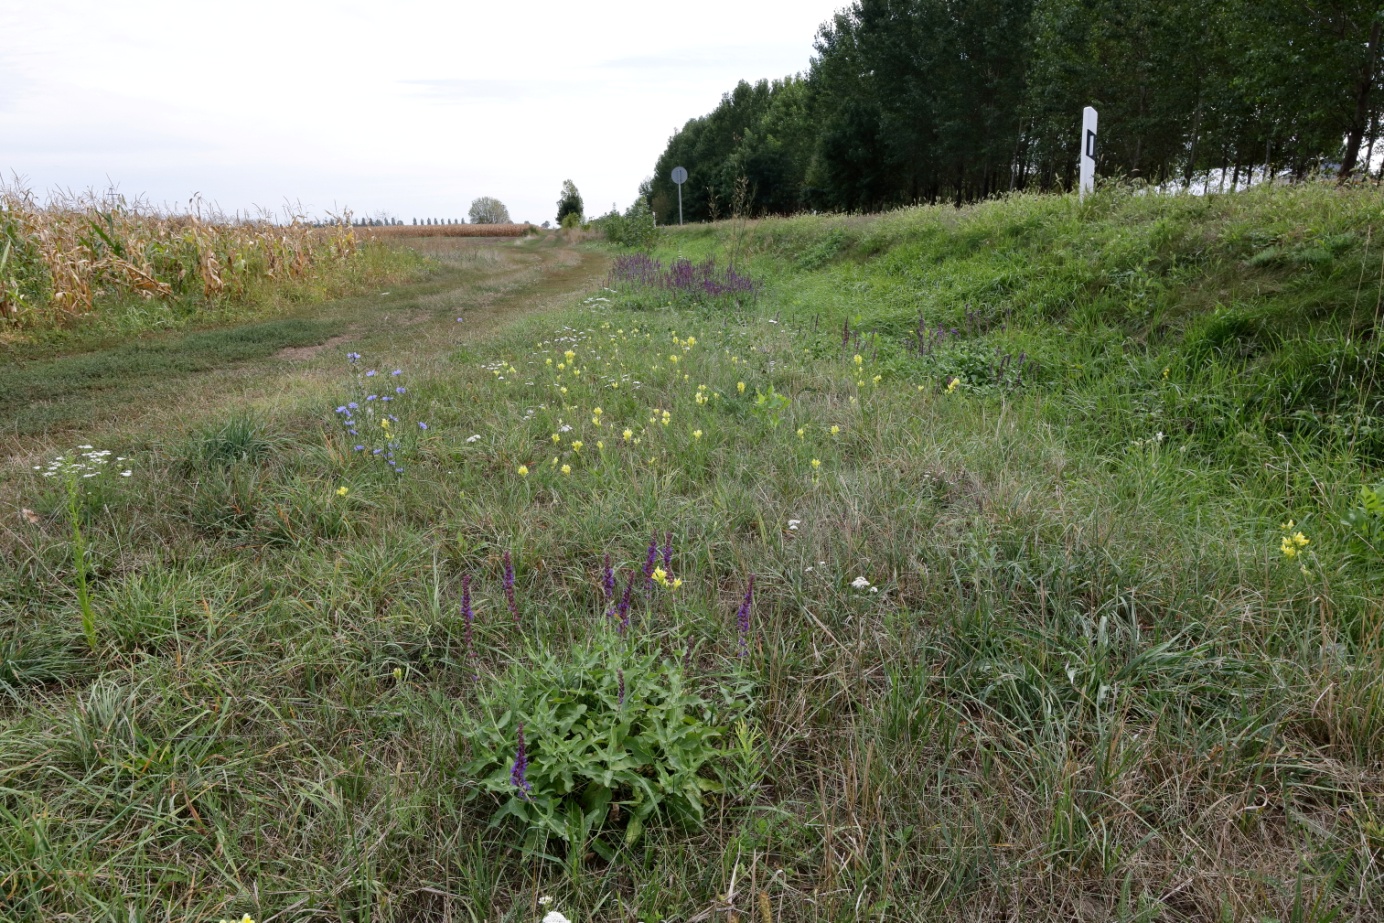


Verge


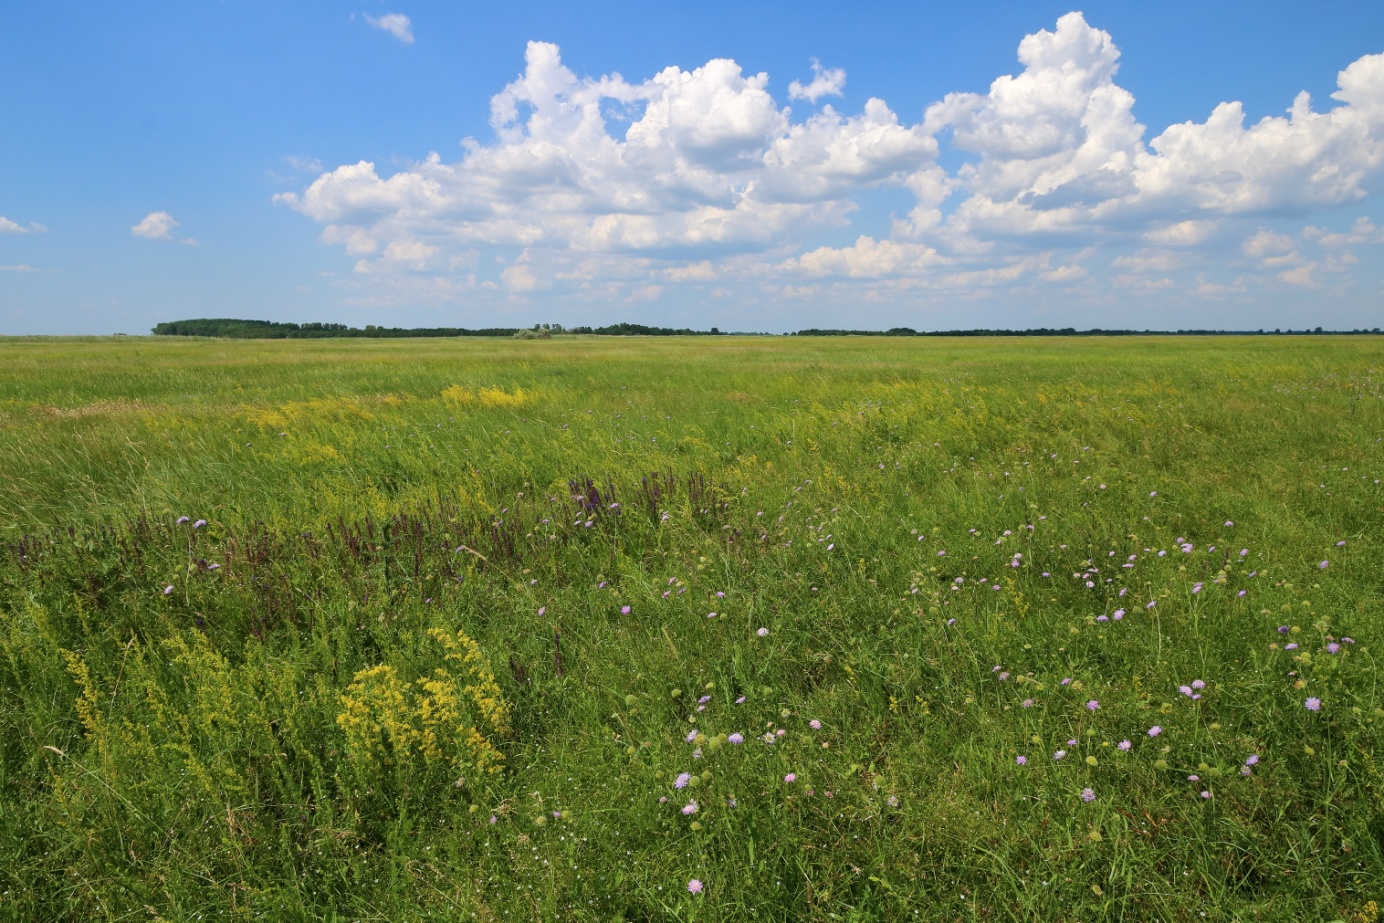


Extensive loess grassland
